# Supplementary material
Source: publisher figshare collection journal article supplement (https://gsajournals.figshare.com/ndownloader/files/14050520)
Supplement: Supplementary file 1 [file 14050520]

## Sheet: Sheet1
vialNumber	crossName	Fec_progeny
1	BC1b	95
2	BC1b	96
3	BC1b	103
4	BC1b	105
5	BC1b	102
6	BC1b	102
1	pse	80
2	pse	92
3	pse	88
4	pse	109
5	pse	90
6	pse	83
1	bog	82
2	bog	76
3	bog	95
4	bog	97
5	bog	72
6	bog	80
1	F8y	86
2	F8y	135
3	F8y	183
4	F8y	140
5	F8y	85
6	F8y	74
1	F8y+	39
2	F8y+	110
3	F8y+	74
4	F8y+	172
5	F8y+	168
6	F8y+	64
1	F8se	114
2	F8se	101
3	F8se	104
4	F8se	102
5	F8se	117
6	F8se	108
1	F8se+	0
2	F8se+	0
3	F8se+	0
4	F8se+	0
5	F8se+	0
6	F8se+	0
1	BC1p	133
2	BC1p	116
3	BC1p	111
4	BC1p	98
5	BC1p	111
6	BC1p	129
1	BC4b	95
2	BC4b	101
3	BC4b	99
4	BC4b	95
5	BC4b	109
6	BC4b	86
